# Supplementary material
Source: ML conference proceedings conference paper supplement (https://openaccess.thecvf.com/content/ICCV2021/html/Pavllo_Learning_Generative_Models_ICCV_2021_paper.html)
Supplement: Supplementary file 2 [file Pavllo_Learning_Generative_Models_ICCV_2021_supplemental.zip]

Archive with 2 entries (2 files):
- appendix.pdf
- video.mp4
